# Supplementary material for: 1-(4-Alkyloxybenzyl)-3-methyl-1H-imidazol-3-ium organic backbone: A versatile smectogenic moiety
Source: Beilstein J Org Chem. 2009 Nov 6;5:62. doi: 10.3762/bjoc.5.62 (PMC2839789; doi:10.3762/bjoc.5.62)
Supplement: File 1 — Product characterization (spectroscopic and analytical data), complementary information about the characterization of the liquid crystalline properties (DSC, X-Ray, dilatometry). [file Beilstein_J_Org_Chem-05-62-s001.doc]

1-(4-Alkyloxybenzyl)-3-methyl-*1H*-imidazol-3-ium organic backbone: A versatile smectogenic moiety

William Dobbs*, Laurent Douce* and Benoît Heinrich

Institut de Physique et Chimie des Matériaux de Strasbourg, UMR 7504, CNRS-Université de Strasbourg, BP 43, 23 rue du Loess, F-67034 Strasbourg Cedex 2

* Corresponding authors

Solvent and Reagents

The commercial products came from Aldrich, Acros, Fluka or Strem Chemical and were used without further purification, except specific indication in this experimental section.

All the organic solvent were distilled before their use:

- Dichloromethane was distilled on CaH2

- Tetrahydrofuran was dried on NaOH before its distillation on Na/benzophenone

The column chromatography were performed on silica gel (Merck 60, 0.04–0.063 m) and on alumina (aluminium oxyde 90 standard, from Merck)

Analytical Measurements

- **The NMR spectroscopy experiments** were performed with a Bruker Avance300 spectrometer at the resonating frequencies 300.13 MHz for 1H NMR spectra and at 75.48 MHz for 13C NMR spectra. CDCl3 or CD2Cl2 were used as solvent for the NMR experiments. For internal calibration the residual solvent peak of CDCl3 (δ (1H) = 7.27 ppm; δ (13C)= 77 ppm) and CD2Cl2 (δ (1H) = 5.32 ppm) were used. The peak attribution was listed as below:

- Chemical shift[[1]](#footnote-2) (multiplicity[[2]](#footnote-3), integration, coupling constant[[3]](#footnote-4), attribution)

- **Infrared spectra** were performed with a Perkin–Elmer Spectrum One spectrophotometer equipped with a ATR (Attenuated Transmitted Reflectance) or with a FT-IR Digilab Excalibur FTS 3000 (In this case, we have prepared IR sample as KBr pastille).

- **Elemental Analysis**: The elemental analyses were performed by the elemental analysis department of the University Louis Pasteur or by the central analytical department of the CNRS (Solaize).

- **Polarized optical microscopy studies**: The optical textures of the mesophases were studied with a Leitz polarizing microscope equipped with a Mettler FP80 hot-stage and an FP80 central processor.

- **Thermic measurements:** The transition temperatures and enthalpies were measured by differential scanning calorimetry with a DSC Q1000 from TA Instruments operated at different temperature rates (5 °C·min−1 , 2 °C·min−1 ) on heating and cooling. The apparatus was calibrated with indium (156.6 °C, 28.4 J·g−1 ) and gallium (29.8 °C) as the standards.

The TGA measurements were carried out on a SDTQ 600 apparatus at scanning rate of 10 °C·min−1  in air.

- **XRD measurements** were performed on three different lines to obtain complementary data at the small angles between 2 Å to 300 Å. Each of them was equipped with a Cu source (Cu[K1], = 1.51418 Å) focalised by a quartz monochromator in the transmission Guinier geometry.

For our compounds, the sample was directly filled in Lindemann capillaries of 1 mm diameter. Our XRD patterns were recorded respectively by curve counter (CPS120 model from INEL) or on image plates (scanned by STORM 820 from Molecular Dynamics with 50 µm resolution).

Analytical Analysis

**18: 1-(4-Octyloxybenzyl)-3-methyl-1*H*-imidazol-3-ium bromide**

**A8**: 2 g (8.5 mmol)

Thionyl bromide: 0.78 mL (10 mmol)

Dichloromethane: 20 mL

*N*-Methylimidazole: 0.8 mL (10 mmol)

Tetrahydrofuran: 10 mL

Yield: 2.71 g, 7.14 mmol (84%)

1H NMR (300 MHz; CDCl3)

: 0.87 (t, 3H, 3*J* (H,H) = 7.2 Hz, CH3 aliphatic chain); 1.28 (m, 8H, CH2 aliphatic chain); 1.37–1.42 (m, 2H, CH2 aliphatic chain); 1.75 (q, 2H, 3*J* (H,H) = 6.8 Hz, O–CH2–CH2); 3.91 (t, 2H, 3*J* (H,H) = 6.6 Hz, OCH2); 4.05 (s, 3H, N–CH3); 5.48 (s, 2H, Ph–CH2–N); 6.86 (d, 2H, 3*J* (H,H) = 8.6 Hz, CH phenyl); 7.29 (s, 1H, CH imidazolium); 7.39 (s, 1H, CH imidazolium); 7.41 (d, 2H, 3*J* (H,H) = 8.6 Hz, CH phenyl); 10.39 (s, 1H, CH imidazolium).

13C NMR (75 MHz; CDCl3 {H})

: 13.93 (CH3 aliphatic chain); 22.47; 25.85; 29.00; 29.05; 29.17; 31.63 (CH2 aliphatic chain); 36.62 (N–CH3); 52.74 (N–CH2–Ph); 68.01 (O–CH2); 115.10 (CH phenyl); 121.62; 123.46 (CH imidazolium); 124.60 (C phenyl); 130.49 (CH phenyl); 136.81 (N–CH–N); 159.85 (C phenyl).

IR: max/cm−1  3421 (H2O) 3133 (C–H aromatic), 2924 and 2855 (C–H aliphatic), 1513 (C=C aromatic), 1248 (aromatic ether).

Elemental analysis (%) calcd for C19H29BrN2O·1.5 H2O: C, 55.9; H, 7.9; N, 6.9; found: C, 55.45; H, 8.00; N, 6.8

**28: 1-(4-Octyloxybenzyl)-3-methyl-1*H*-imidazol-3-ium tetrafluoroborate**

Sodium tetrafluoroborate: 0.22 g (2 mmol)

1-(4-Octyloxybenzyl)-3-methyl-1*H*-imidazol-3-ium bromide: 0.5 g (1.3 mmol)

Water: 10 mL

Yield: 0.47 g, 1.2 mmol (93%)

1H NMR (300 MHz; CDCl3)

: 0.89 (t, 3H, 3*J* (H,H) = 7,0 Hz, CH3 aliphatic chain); 1.27–1.31 (m, 8H, CH2 aliphatic chain); 1.41 (m, 2H, CH2 aliphatic chain); 1.76 (q, 2H, 3*J* (H,H) = 6,8 Hz, O–CH2–CH2); 3.90 (t, 2H, 3*J* (H,H) = 6,6 Hz, OCH2); 3.94 (s, 3H, N–CH3); 5.23 (s, 2H, Ph–CH2–N); 6.88 (d, 2H, 3*J* (H,H) = 8,6 Hz, CH phenyl); 7.17 (m, 1H, CH imidazolium); 7.25 (m, 1H, CH imidazolium); 7.32 (d, 2H, 3*J* (H,H) = 8.6 Hz, CH phenyl); 8.83 (s, 1H, CH imidazolium).

13C NMR (75 MHz; CDCl3 {H})

: 14.04 (CH3 aliphatic chain); 22.61; 25.99; 29.16; 29.19; 29.32; 31.78 (CH2 aliphatic chain); 36.29 (N–CH3); 53.07 (N–CH2–Ph); 68.17 (O–CH2); 115.34 (CH phenyl); 121.64; 123.50 (CH imidazolium); 124.31 (C phenyl); 130.57 (CH phenyl); 136.38 (N–CH–N); 160.10 (C phenyl).

IR: max/cm−1  3161 (C–H aromatic), 2923 and 2854 (C–H aliphatic), 1515 (C=C aromatic), 1249 (aromatic ether), 1036 (BF4−)

Elemental analysis (%) calcd for C19H29BF4N2O·¼ H2O: C, 58.1; H, 7.6; N, 7.1; found: C, 58.2; H, 7.6; N, 7.1

**38: 1-(4-Octyloxybenzyl)-3-methyl-1*H*-imidazol-3-ium hexafluorophosphate**

Potassium hexafluorophosphate: 0.239 g (1.3 mmol)

1-(4-Octyloxybenzyl)-3-methyl-1*H*-imidazol-3-ium bromide: 0.5 g (1.3 mmol)

Water: 10 mL

Yield: 0.49 g, 1.1 mmol (84%)

1H NMR (300 MHz; CDCl3)

: 0.89 (t, 3H, 3*J* (H,H) = 7,0 Hz, CH3 aliphatic chain); 1.26–1.30 (m, 8H, CH2 aliphatic chain); 1.40 (m, 2H, CH2 aliphatic chain); 1.76 (q, 2H, 3*J* (H,H) = 6,8 Hz, O–CH2–CH2); 3.86 (s, 3H, N–CH3); 3.91 (t, 2H, 3*J* (H,H) = 6,6 Hz, OCH2); 5.18 (s, 2H, Ph–CH2–N); 6.88 (d, 2H, 3*J* (H,H) = 8,6 Hz, CH phenyl); 7.13 (s, 1H, CH imidazolium); 7.21 (s, 1H, CH imidazolium); 7.29 (d, 2H, 3*J* (H,H) = 8.6 Hz, CH phenyl); 8.53 (s, 1H, CH imidazolium).

13C NMR (75 MHz; CDCl3 {H})

: 14.06 (CH3 aliphatic chain); 22.62; 25.8; 29.14; 29.19; 29.31; 31.78 (CH2 aliphatic chain); 36.20 (N–CH3); 53.06 (N–CH2–Ph); 68.15 (O–CH2); 115.34 (CH phenyl); 121.65; 123.55 (CH imidazolium); 124.99 (C phenyl); 130.57 (CH phenyl); 135.80 (N–CH–N); 160.12 (C phenyl).

IR: max/cm−1  3178 (C–H aromatic), 2918 and 2852 (C–H aliphatic), 1516 (C=C aromatic), 1251 (aromatic ether), 823 (PF6−)

Elemental analysis (%) calcd for C19H29F6N2OP·¾ H2O: C, 49.5; H, 6.7; N, 6.1; found: C, 49.6; H, 6.4; N, 6.0

**48: 1-(4-Octyloxybenzyl)-3-methyl-1*H*-imidazol-3-ium thiocyanate**

Sodium thiocyanate: 0.065 g (0.66 mmol)

1-(4-Octyloxybenzyl)-3-methyl-1*H*-imidazol-3-ium bromide: 0.25 g (0.65 mmol)

Yield: 0,187 g, 0.53 mmol (80%)

1H NMR (300 MHz; CD2Cl2)

: 0.88 (t, 3H, 3*J* (H,H) = 7.0 Hz, CH3 aliphatic chain); 1.29 (m, 8H, CH2 aliphatic chain); 1.43 (m, 2H, CH2 aliphatic chain); 1.76 (q, 2H, 3*J* (H,H) = 6.6 Hz, O–CH2–CH2); 3.94 (t, 2H, 3*J* (H,H) = 6.6 Hz, OCH2); 3.99 (s, 3H, N–CH3); 5.38 (s, 2H, Ph–CH2–N); 6.91 (d, 2H, 3*J* (H,H) = 8,6 Hz, CH phenyl); 7.29 (s, 1H, CH imidazolium); 7.33 (s, 1H, CH imidazolium); 7.39 (d, 2H, 3*J* (H,H) = 8.6 Hz, CH phenyl); 9.33 (s, 1H, CH imidazolium).

13C NMR (75 MHz; CD2Cl2 {H})

: 14.20 (CH3 aliphatic chain); 22.99; 26.33; 29.53; 29.57; 29.68; 32.16 (CH2 aliphatic chain); 37.02 (N–CH3); 53.64 (N–CH2–Ph); 68.63 (O–CH2); 115.62 (CH phenyl); 122.25; 123.96 (CH imidazolium); 124.86 (C phenyl); 130.99 (CH phenyl); 137.17 (N–CH–N); 131.78 (SCN); 160.55 (C phenyl).

IR: max/cm−1  3350 (H2O), 3095 (C–H aromatic), 2921 and 2854 (C–H aliphatic), 2052 (SCN−) 1514 (C=C aromatic), 1248 (aromatic ether)

Elemental analysis (%) calcd for C20H29N3OS·H2O: C, 63.6; H, 8.3; N, 11.1; found: C, 63.3; H, 8.25; N, 11.0

**58: 1-(4-Octyloxybenzyl)-3-methyl-1*H*-imidazol-3-ium trifluoromethanesulfonate**

Sodium trifluoromethanesulfonate: 0.114 g (0.66 mmol)

1-(4-Octyloxybenzyl)-3-methyl-1*H*-imidazol-3-ium bromide: 0.25 g (0.66 mmol)

Water: 15 mL

Yield: 0.248 g, 0,55 mmol (83%)

1H NMR (300 MHz; CDCl3)

: 0.89 (t, 3 H, 3*J* (H,H) = 6.8 Hz, CH3 aliphatic chain); 1.31 (m, 8H, CH2 aliphatic chain); 1.44 (m, 2H, CH2 aliphatic chain); 1.77 (q, 2 H, 3*J* (H,H) = 6.6 Hz, O–CH2–CH2); 3.94 (t, 2 H, 3*J* (H,H) = 6.6 Hz, OCH2); 3.95 (s, 3 H, CH3–N); 5.28 (s, 2 H, N–CH2–Ph); 6.90 (d, 2 H, 3*J* (H,H) = 8.6 Hz, CH phenyl); 7.17 (m, 1 H, CH imidazolium); 7.25 (m, 1 H, CH imidazolium); 7.33 (d, 2 H, 3*J* (H,H) = 8.6 Hz, CH phenyl); 9.20 (s, 1 H, N–CH–N).

13C NMR (75 MHz; CDCl3 {H})

: 14.05 (CH3 aliphatic chain); 22.63; 25.99; 29.14; 29.20; 29.32; 31.78 (CH2 aliphatic chain); 36.46 (N–CH3); 53.23 (N–CH2–Ph); 68.21 (O–CH2); 115.41 (CH phenyl); 119.12 (q, *J (*C–F)= 317.5 Hz, CF3); 121.62; 123.39 (CH imidazolium); 124.10 (C phenyl); 130.57 (CH phenyl); 136.89 (N–CH–N); 160.09 (C phenyl).

IR: max/cm−1  3122 (C–H aromatic), 2921 and 2851 (C–H aliphatic), 1516 (C=C aromatic), 1249 and 1029 (CF3SO3−).

Elemental analysis (%) calcd for C20H29F3N2O4S·¼ H2O: C, 52.8; H, 6.5; N, 6.2; found: C, 52.7; H, 6.6; N, 6.1

**68: 1-(4-Octyloxybenzyl)-3-methyl-1*H*-imidazol-3-ium bis[(trifluoromethyl)sulfonyl]amide**

Lithium bis[(trifluoromethyl)sulfonyl]amide: 0.207 g (0.72 mmol)

1-(4-Octyloxybenzyl)-3-methyl-1*H*-imidazol-3-ium bromide: 0.25 g (0.65 mmol)

Yield: 0.28 g, 0.48 mmol (74%)

1H NMR (300 MHz; CDCl3)

: 0.90 (t, 3H, 3*J* (H,H) = 7,0 Hz, CH3 aliphatic chain); 1.31 (m, 8H, CH2 aliphatic chain); 1.45 (m, 2H, CH2 aliphatic chain); 1.79 (q, 2H, 3*J* (H,H) = 6,8 Hz, O–CH2–CH2); 3.95 (s, 3H, N–CH3); 3.96 (t, 2H, 3*J* (H,H) = 6,6 Hz, OCH2); 5.26 (s, 2H, Ph–CH2–N); 6.93 (d, 2H, 3*J* (H,H) = 8,6 Hz, CH phenyl); 7.14 (s, 1H, CH imidazolium); 7.20 (s, 1H, CH imidazolium); 7.30 (d, 2H, 3*J* (H,H) = 8.6 Hz, CH phenyl); 8.82 (s, 1H, CH imidazolium).

13C NMR (75 MHz; CDCl3 {H})

: 14.05 (CH3 aliphatic chain); 22.63; 25.99; 29.14; 29.20; 29.31; 31.79 (CH2 aliphatic chain); 36.54 (N–CH3); 53.46 (N–CH2–Ph); 68.26 (O–CH2); 115.55 (CH phenyl); 119.83 (quadruplet, *J* (C,F)= 319.1 Hz, CF3); 121.77; 123.42 (CH imidazolium); 123.51 (C phenyl); 130.59 (CH phenyl); 136.23 (N–CH–N); 160.41 (C phenyl).

IR: max/cm−1  3154 (C–H aromatic), 2929 and 2858 (C–H aliphatic), 1516 (C=C aromatic), 1349 and 1178 ([CF3SO2]2N−)

Elemental analysis (%) calcd for C21H29F6N3O5S2·½ H2O: C, 42.7; H, 5.1; N, 7.1; found: C, 42.7; H, 4.9; N, 7.0

**110: 1-(4-Decyloxybenzyl)-3-methyl-1*H*-imidazol-3-ium bromide**

**A10**: 3 g (11.3 mmol)

Thionyl bromide: 1 mL (13 mmol)

Dichloromethane: 20 mL

*N*-Methylimidazole: 1 mL (12.5 mmol)

Tetrahydrofuran: 10 mL

Yield: 3.9 g, 9,61 mmol (85%)

1H NMR (300 MHz; CDCl3)

: 0.88 (t, 3H, 3*J* (H,H) = 7.2 Hz, CH3 aliphatic chain); 1.27 (br s, 12H, CH2 aliphatic chain); 1.41 (m, 2H, CH2 aliphatic chain); 1.77 (q, 2H, 3*J* (H,H) = 6.8 Hz, O–CH2–CH2); 3.93 (t, 2H, 3*J* (H,H) = 6.6 Hz, OCH2); 4.07 (s, 3H, N–CH3); 5.48 (s, 2H, Ph–CH2–N); 6.89 (d, 2H, 3*J* (H,H) = 8.6 Hz, CH phenyl); 7.18 (s, 1H, CH imidazolium); 7.26 (s, 1H, CH imidazolium); 7.41 (d, 2H, 3*J* (H,H) = 8.6 Hz, CH phenyl); 10.60 (s, 1H, CH imidazolium).

13C NMR (75 MHz; CDCl3 {H})

: 14.07 (CH3 aliphatic chain); 22.64; 25.98; 29.13; 29.27; 29.34; 29.53; 31.86 (CH2 aliphatic chain); 36.75 (N–CH3); 53.14 (N–CH2–Ph); 68.18 (O–CH2); 115.34 (CH phenyl); 121.33; 122.97 (CH imidazolium); 124.30 (C phenyl); 130.63 (CH phenyl); 137.76 (N–CH–N); 160.14 (C phenyl).

IR: max/cm−1  3408 (H2O) 3133 (C–H aromatic), 2921 and 2853 (C–H aliphatic), 1512 (C=C aromatic), 1246 (aromatic ether).

Elemental analysis (%) calcd for C21H33BrN2O·H2O: C, 59.0; H, 8.25; N, 6.55; found: C, 59.2; H, 8.1; N, 6.5

**210: 1-(4-Decyloxybenzyl)-3-methyl-1*H*-imidazol-3-ium tetrafluoroborate**

Potassium tetrafluoroborate: 0.568 g (5.2 mmol)

1-(4-Decyloxybenzyl)-3-methyl-1*H*-imidazol-3-ium bromide: 2 g (4.9 mmol)

Yield: 1.9 g, 4.84 mmol (93%)

1H NMR (300 MHz; CDCl3)

: 0.88 (t, 3H, 3*J* (H,H) = 6.8 Hz, CH3 aliphatic chain); 1.28 (br s, 12H, CH2 aliphatic chain); 1.42 (m, 2H, CH2 aliphatic chain); 1.77 (q, 2H, 3*J* (H,H) = 6.8 Hz, O–CH2–CH2); 3.91 (s, 3H, N–CH3); 3.92 (t, 2H, 3*J* (H,H) = 6.6 Hz, OCH2); 5.24 (s, 2H, Ph–CH2–N); 6.88 (d, 2H, 3*J* (H,H) = 8.6 Hz, CH phenyl); 7.17 (m, 1H, CH imidazolium); 7.25 (m, 1H, CH imidazolium); 7.30 (d, 2H, 3*J* (H,H) = 8.6 Hz, CH phenyl); 8.86 (s, 1H, CH imidazolium).

13C NMR (75 MHz; CDCl3 {H})

:14.07 (CH3 aliphatic chain); 22.64; 25.99; 29.16; 29.28; 29.37; 29.53; 31.86 (CH2 aliphatic chain); 36.31 (N–CH3); 53.08 (N–CH2–Ph); 68.18 (O–CH2); 115.34 (CH phenyl); 121.62; 123.49 (CH imidazolium); 124.30 (C phenyl); 130.59 (CH phenyl); 136.41 (N–CH–N); 160.11 (C phenyl).

IR: max/cm−1  3157 (C–H aromatic), 2920 and 2852 (C–H aliphatic), 1515 (C=C aromatic), 1252 (aromatic ether), 1049 (BF4−)

Elemental analysis (%) calcd for C21H33BF4N2O: C, 60.6; H, 8.0; N, 6.7; found: C, 60.5; H, 7.9; N, 6.7

**310: 1-(4-Decyloxybenzyl)-3-methyl-1*H*-imidazol-3-ium hexafluorophosphate**

Potassium hexafluorophosphate: 0.341 g (1.9 mmol)

1-(4-Decyloxybenzyl)-3-methyl-1*H*-imidazol-3-ium bromide: 0.5 g (1.2 mmol)

Yield: 0.48 g, 0.96 mmol (80%)

1H NMR (300 MHz; CDCl3)

: 0.88 (t, 3H, 3*J* (H,H) = 6.8 Hz, CH3 aliphatic chain); 1.28 (br s, 12H, CH2 aliphatic chain); 1.38–1.43 (m, 2H, CH2 aliphatic chain); 1.77 (q, 2H, 3*J* (H,H) = 6,8 Hz, O–CH2–CH2); 3.92 (s, 3H, N–CH3); 3.94 (t, 2H, 3*J* (H,H) = 6,6 Hz, OCH2); 5.23 (s, 2H, Ph–CH2–N); 6.92 (d, 2H, 3*J* (H,H) = 8,6 Hz, CH phenyl); 7.11 (s, 1H, CH imidazolium); 7.18 (s, 1H, CH imidazolium); 7.30 (d, 2H, 3*J* (H,H) = 8.6 Hz, CH phenyl); 8.69 (s, 1H, CH imidazolium).

13C NMR (75 MHz; CDCl3 {H})

: 14.07 (CH3 aliphatic chain); 22.64; 25.98; 29.15; 29.29; 29.38; 29.54; 31.86 (CH2 aliphatic chain); 36.21 (N–CH3); 53.07 (N–CH2–Ph); 68.16 (O–CH2); 115.34 (CH phenyl); 121.65; 123.53 (CH imidazolium); 123.99 (C phenyl); 130.57 (CH phenyl); 135.84 (N–CH–N); 160.12 (C phenyl).

IR: max/cm−1  3179 (C–H aromatic), 2918 and 2851 (C–H aliphatic), 1517 (C=C aromatic), 1252 (aromatic ether), 822 (PF6−).

Elemental analysis (%) calcd for C21H33F6N2OP: C, 53.2; H, 7.0; N, 5.9; found: C, 53.5; H, 6.9; N, 5.8

**410: 1-(4-Decyloxybenzyl)-3-methyl-1*H*-imidazol-3-ium thiocyanate**

Potassium thiocyanate: 0.25 g (2.56 mmol)

1-(4-Decyloxybenzyl)-3-methyl-1*H*-imidazol-3-ium bromide: 0.5 g (1.28 mmol)

Yield: 0.4 g, 1.02 mmol(80%)

1H NMR (300 MHz; CDCl3)

: 0.88 (t, 3H, 3*J* (H,H) = 6.8 Hz, CH3 aliphatic chain); 1.27 (br s, 12H, CH2 aliphatic chain); 1.42 (m, 2H, CH2 aliphatic chain); 1.76 (q, 2H, 3*J* (H,H) = 6,8 Hz, O–CH2–CH2); 3.93 (t, 2H, 3*J* (H,H) = 6,6 Hz, OCH2); 4.06 (s, 3H, N–CH3); 5.42 (s, 2H, Ph–CH2–N); 6.91 (d, 2H, 3*J* (H,H) = 8,7 Hz, CH phenyl); 7.28 (m, 1H, CH imidazolium); 7.36 (m, 1H, CH imidazolium); 7.39(d, 2H, 3*J* (H,H) = 8.7 Hz, CH phenyl); 9.45 (s, 1H, CH imidazolium).

13C NMR (75 MHz; CDCl3 {H})

:14.05 (CH3 aliphatic chain); 22.61; 25.97; 29.13; 29.25; 29.33; 29.50; 29.51; 31.83 (CH2 aliphatic chain); 36.79 (N–CH3); 53.41 (N–CH2–Ph); 68.19 (O–CH2); 115.40 (CH phenyl); 121.80; 123.50 (CH imidazolium); 124.15 (C phenyl); 130.70 (CH phenyl); 131.67 (SCN); 136.89 (N–CH–N); 160.17 (C phenyl).

IR: max/cm−1  3290 (H2O) 3147 (C–H aromatic), 2917 and 2850 (C–H aliphatic), 2063 (SCN−) 1514 (C=C aromatic), 1249 (aromatic ether).

Elemental analysis (%) calcd for C22H33N3OS·H2O: C, 65.15; H, 8.7; N, 10.4; found: C, 65.3; H, 8.75; N, 10.2

**510: 1-(4-Decyloxybenzyl)-3-methyl-1*H*-imidazol-3-ium trifluoromethanesulfonate**

Sodium trifluoromethanesulfonate: 0.42 g (2.44 mmol)

1-(4-Decyloxybenzyl)-3-methyl-1*H*-imidazol-3-ium bromide: 0.5 g (1.22 mmol)

Water: 20 mL

Yield: 0.42 g, 0,86 mmol (72%)

1H NMR (300 MHz; CDCl3)

: 0.89 (t, 3 H, 3*J* (H,H) = 6.8 Hz, CH3 aliphatic chain); 1.27 (br s, 12 H, CH2 aliphatic chain); 1.35–1.48 (m, 2 H, CH2 aliphatic chain); 1.78 (q, 2 H, 3*J* (H,H) = 6.6 Hz, O–CH2–CH2); 3.94 (t, 2 H, 3*J* (H,H) = 6.6 Hz, OCH2); 3.96 (s, 3 H, CH3–N); 5.28 (s, 2 H, N–CH2–Ph); 6.91 (d, 2 H, 3*J* (H,H) = 8.7 Hz, CH phenyl); 7.16 (m, 1 H, CH imidazolium); 7.23 (m, 1 H, CH imidazolium); 7.31 (d, 2 H, 3*J* (H,H) = 8.7 Hz, CH phenyl); 9.22 (s, 1 H, N–CH–N).

13C NMR (75 MHz; CDCl3 {H})

:14.07 (CH3 aliphatic chain); 22.65; 25.99; 29.15; 29.29; 29.36; 29.54; 31.87 (CH2 aliphatic chain); 36.49 (N–CH3); 53.29 (N–CH2–Ph); 68.22 (O–CH2); 115.43 (CH phenyl); 120.70 (q, *J (*C–F)= 318 Hz, CF3); 121.57; 123.30 (CH imidazolium); 124.02 (C phenyl); 130.59 (CH phenyl); 137.01 (N–CH–N); 160.25 (C phenyl).

IR: max/cm−1  3157 (C–H aromatic), 2919 and 2849 (C–H aliphatic), 1517 (C=C aromatic), 1247 and 1030 (CF3SO3−).

Elemental analysis (%) calcd for C22H33F3N2O4S: C, 55.2; H, 6.95; N, 5.85; found: C, 55.2; H, 6.8; N, 5.8

**610: 1-(4-Decyloxybenzyl)-3-methyl-1*H*-imidazol-3-ium bis[(trifluoromethyl)sulfonyl]amide**

Lithium bis[(trifluoromethyl)sulfonyl]amide: 0.193 g (0.67 mmol)

1-(4-Decyloxybenzyl)-3-methyl-1*H*-imidazol-3-ium bromide: 0.25 g (0.61 mmol)

Yield: 0.28 g, 0.46 mmol (76%)

1H NMR (300 MHz; CDCl3)

: 0.89 (t, 3H, 3*J* (H,H) = 6.8 Hz, CH3 aliphatic chain); 1.28 (br s, 12H, CH2 aliphatic chain); 1.42 (m, 2H, CH2 aliphatic chain); 1.79 (q, 2H, 3*J* (H,H) = 6,8 Hz, O–CH2–CH2); 3.94 (s, 3H, N–CH3); 3.95 (t, 2H, 3*J* (H,H) = 6,6 Hz, OCH2); 5.26 (s, 2H, Ph–CH2–N); 6.92 (d, 2H, 3*J* (H,H) = 8,6 Hz, CH phenyl); 7.14 (s, 1H, CH imidazolium); 7.21 (s, 1H, CH imidazolium); 7.30 (d, 2H, 3*J* (H,H) = 8.6 Hz, CH phenyl); 8.82 (s, 1H, CH imidazolium).

13C NMR (75 MHz; CDCl3 {H})

: 14.07 (CH3 aliphatic chain); 22.66; 25.99; 29.15; 29.30; 29.36; 29.54; 31.88 (CH2 aliphatic chain); 36.53 (N–CH3); 53.45 (N–CH2–Ph); 68.26 (O–CH2); 115.53 (CH phenyl); 120.15 (quadruplet, *J* (C,F)= 319.10 Hz, CF3); 121.77; 123.45 (CH imidazolium); 123.52 (C phenyl); 130.59 (CH phenyl); 136.20 (N–CH–N); 160.40 (C phenyl).

IR: max/cm−1  3157 (C–H aromatic), 2919 and 2849 (C–H aliphatic), 1517 (C=C aromatic), 1352 and 1181 ([CF3SO2]2N−)

Elemental analysis (%) calcd for C23H33F6N3O5S2: C, 45.3; H, 5.5; N, 6.9; found: C, 45.1; H, 5.6; N, 6.8

**112: 1-(4-Dodecyloxybenzyl)-3-methyl-1*H*-imidazol-3-ium bromide**

**A12**: 8.2 g (28 mmol)

Thionyl bromide: 2.25 mL (28 mmol)

Dichloromethane: 80 mL

*N*-Methylimidazole: 2.3 mL (28 mmol)

Tetrahydrofuran: 80 mL

Yield: 10.8 g, 24,6 mmol (88%)

1H NMR (300 MHz; CDCl3)

: 0.88 (t, 3 H, 3*J* (H,H) = 6.9 Hz, CH3 aliphatic chain); 1.27 (br s, 16 H, CH2 aliphatic chain); 1.44 (m, 2 H, CH2 aliphatic chain); 1.78 (q, 2 H, 3*J* (H,H) = 6.9 Hz, O–CH2–CH2); 3.95 (t, 2 H, 3*J* (H,H) = 6.5 Hz, OCH2); 4.08 (s, 3 H, CH3–N); 5.47 (s, 2 H, N–CH2–Ph); 6.91 (d, 2 H, 3*J* (H,H) = 8.6 Hz, CH phenyl); 7.09 (m, 1 H, CH imidazolium); 7.13 (m, 1 H, CH imidazolium); 7.40 (d, 2 H, 3*J* (H,H) = 8.6 Hz, CH phenyl); 10.89 (s, 1 H, N–CH–N).

13C NMR (75 MHz; CDCl3 {H})

: 13.86 (CH3 aliphatic chain); 22.42; 25.76; 28.92; 29.08; 29.15; 29.31; 29.34; 29.36; 29.40; 31.64 (CH2 aliphatic chain); 36.52 (N–CH3); 52.56 (N–CH2–Ph); 67.90 (O–CH2); 114.94 (CH phenyl); 121.58; 123.47 (CH imidazolium); 124.61 (C phenyl); 130.39 (CH phenyl); 136.54 (N–CH–N); 159.71 (C phenyl).

IR: max/cm−1  3133 (C–H aromatic), 2919 and 2850 (C–H aliphatic), 1513 (C=C aromatic), 1248 (aromatic ether).

Elemental analysis (%) calcd for C23H37BrN2O: C, 63.15; H, 8.5; N, 6.4; found: C, 62.7; H, 8.55; N, 6.45

**212: 1-(4-Dodecyloxybenzyl)-3-methyl-1*H*-imidazol-3-ium tetrafluoroborate**

Sodium tetrafluoroborate: 0.064 g (0.57 mmol)

1-(4-Dodecyloxybenzyl)-3-methyl-1*H*-imidazol-3-ium bromide: 0.25 g (0.57 mmol)

Yield: 0.25 g, 0,56 mmol (98%)

1H NMR (300 MHz; CDCl3)

: 0.89 (t, 3 H, 3*J* (H,H) = 6.8 Hz, CH3 aliphatic chain); 1.27 (br s, 16 H, CH2 aliphatic chain); 1.42 (m, 2 H, CH2 aliphatic chain); 1.76 (q, 2 H, 3*J* (H,H) = 6.8 Hz, O–CH2–CH2); 3.94 (t, 2 H, 3*J* (H,H) = 6.5 Hz, OCH2); 3.98 (s, 3 H, CH3–N); 5.29 (s, 2 H, N–CH2–Ph); 6.91 (d, 2 H, 3*J* (H,H) = 8.6 Hz, CH phenyl); 7.09 (m, 1 H, CH imidazolium); 7.16 (m, 1 H, CH imidazolium); 7.33 (d, 2 H, 3*J* (H,H) = 8.6 Hz, CH phenyl); 9.1 (s, 1 H, N–CH–N).

13C NMR (75 MHz; CDCl3 {H})

δ: 14.10 (CH3 aliphatic chain); 22.67; 26.00; 29.16; 29.33; 29.39; 29.57; 29.59; 29.62; 29.65; 31.90 (CH2 aliphatic chain); 36.37 (N–CH3); 53.15 (N–CH2–Ph); 67.18 (O–CH2); 115.35 (CH phenyl); 121.57; 123.38 (CH imidazolium); 124.17 (C phenyl); 130.60 (CH phenyl); 136.56 (N–CH–N); 160.13 (C phenyl).

IR: max/cm−1  3154 (C–H aromatic), 2919 and 2848 (C–H aliphatic), 1515 (C=C aromatic), 1251 (aromatic ether), 1036 (BF4−)

Elemental analysis (%) calcd for C23H37BF4N2O·½ H2O: C, 60.9; H, 8.45; N, 6.2; found: 60.6; H, 8.25; N, 6.1

**312: 1-(4-Dodecyloxybenzyl)-3-methyl-1*H*-imidazol-3-ium hexafluorophosphate**

Potassium hexafluorophosphate: 0.105 g

1-(4-Dodecyloxybenzyl)-3-methyl-1*H*-imidazol-3-ium bromide: 0.25 g (0.57 mmol)

Yield: 0.285 g, 0,56 mmol (99%)

1H NMR (300 MHz; CDCl3)

: 0.89 (t, 3 H, 3*J* (H,H) = 6.9 Hz, CH3 aliphatic chain); 1.27 (br s, 16 H, CH2 aliphatic chain); 1.44 (m, 2 H, CH2 aliphatic chain); 1.77 (q, 2 H, 3*J* (H,H) = 6.9 Hz, O–CH2–CH2); 3.89 (s, 3 H, CH3–N); 3.93 (t, 2 H, 3*J* (H,H) = 6.5 Hz, OCH2); 5.20 (s, 2 H, N–CH2–Ph); 6.90 (d, 2 H, 3*J* (H,H) = 8.6 Hz, CH phenyl); 7.11 (m, 1 H, CH imidazolium); 7.20 (m, 1 H, CH imidazolium); 7.30 (d, 2 H, 3*J* (H,H) = 8.6 Hz, CH phenyl); 8.58 (s, 1 H, N–CH–N).

13C NMR (75 MHz; CDCl3 {H})

: 14.09 (CH3 aliphatic chain); 22.66; 26.00; 29.17; 29.33; 29.40; 29.57; 29.59; 29.62; 29.65; 31.89 (CH2 aliphatic chain); 36.21 (N–CH3); 53.09 (N–CH2–Ph); 68.17 (O–CH2); 115.36 (CH phenyl); 121.65; 123.54 (CH imidazolium); 123.96 (C phenyl); 130.58 (CH phenyl); 135.82 (N–CH–N); 160.14 (C phenyl).

IR: max/cm−1  3178 (C–H aromatic), 2916 and 2850 (C–H aliphatic), 1251 (aromatic ether), 823 (PF6(–))

Elemental analysis (%) calcd for C23H37F6N2OP: C, 55,0; H, 7.4; N, 5.6; found: 54.8; H, 7.0; N, 5.6

**412: 1-(4-Dodecyloxybenzyl)-3-methyl-1*H*-imidazol-3-ium thiocyanate**

Potassium thiocyanate: 0.055 g (0.57 mmol)

1-(4-Dodecyloxybenzyl)-3-methyl-1*H*-imidazol-3-ium bromide: 0.25 g (0.57 mmol)

Water: 20 mL

Yield: 0.226 g, 0.54 mmol (95%)

1H NMR (300 MHz; CDCl3)

: 0.82 (t, 3 H, 3*J* (H,H) = 6.8 Hz, CH3 aliphatic chain); 1.20 (br s, 16 H, CH2 aliphatic chain); 1.35 (m, 2 H, CH2 aliphatic chain); 1.71 (q, 2 H, 3*J* (H,H) = 6.8 Hz, O–CH2–CH2); 3.88 (t, 2 H, 3*J* (H,H) = 6.5, OCH2); 4.02 (s, 3 H, CH3–N); 5.36 (s, 2 H, N–CH2–Ph); 6.86 (d, 2 H, 3*J* (H,H) = 8.6 Hz, CH phenyl); 7.08 (m, 1 H, CH imidazolium); 7.13 (m, 1 H, CH imidazolium); 7.31 (d, 2 H, 3*J* (H,H) = 8.6 Hz, CH phenyl); 9.63 (s, 1 H, N–CH–N).

13C NMR (75 MHz; CDCl3 {H})

: 14.05 (CH3 aliphatic chain); 22.60; 25.94; 29.10; 29.26; 29.33; 29.50; 29.52; 29.55; 29.58; 31.83 (CH2 aliphatic chain); 36.72 (N–CH3); 52.26 (N–CH2–Ph); 68.12 (O–CH2); 115.27 (CH phenyl); 121.80; 123.54 (CH imidazolium); 124.22 (C phenyl); 130.66 (CH phenyl); 131.66 SCN); 136.64 (N–CH–N); 160.01 (C phenyl).

IR: max/cm−1  3147 (C–H aromatic); 2916 and 2849 (C–H aliphatic); 2064 (SCN), 1514 (C=C aromatic); 1249 (aromatic ether)

Elemental analysis (%) calcd for C24H37N3OS·H2O: C, 66.5; H, 9.1; N, 9.7; found: 66.3; H, 9.0; N, 9.6

**512: 1-(4-Dodecyloxybenzyl)-3-methyl-1*H*-imidazol-3-ium trifluoromethanesulfonate**

Sodium trifluoromethanesulfonate: 0.099 g (0,57 mmol)

1-(4-Dodecyloxybenzyl)-3-methyl-1*H*-imidazol-3-ium bromide: 0.25 g (0,57 mmol)

Water: 60 mL

Yield: 0.26 g, 0.51 mmol (90%)

1H NMR (300 MHz; CDCl3)

: 0.89 (t, 3 H, 3*J* (H,H) = 6.8 Hz, CH3 aliphatic chain); 1.27 (br s, 16 H, CH2 aliphatic chain); 1.35–1.48 (m, 2 H, CH2 aliphatic chain); 1.78 (q, 2 H, 3*J* (H,H) = 6.6 Hz, O–CH2–CH2); 3.95 (t, 2 H, 3*J* (H,H) = 6.6 Hz, OCH2); 3.99 (s, 3 H, CH3–N); 5.31 (s, 2 H, N–CH2–Ph); 6.92 (d, 2 H, 3*J* (H,H) = 8.6 Hz, CH phenyl); 7.10 (m, 1 H, CH imidazolium); 7.16 (m, 1 H, CH imidazolium); 7.32 (d, 2 H, 3*J* (H,H) = 8.6 Hz, CH phenyl); 9.40 (s, 1 H, N–CH–N).

13C NMR (75 MHz; CDCl3 {H})

:14.02 (CH3 aliphatic chain); 22.60; 25.94; 29.10; 29.26; 29.26; 29.32; 29.50; 29.53; 29.58; 31.83 (CH2 aliphatic chain); 36.26 (N–CH3); 52.96 (N–CH2–Ph); 68.10(O–CH2); 115.23 (CH phenyl); 120.6 (q, *J (*C–F)= 320 Hz, CF3); 121.76; 123.61 (CH imidazolium); 124.31 (C phenyl); 130.46 (CH phenyl); 136.34 (N–CH–N); 160.02 (C phenyl).

IR: max/cm−1  3122 (C–H aromatic), 2918 and 2850 (C–H aliphatic), 1516 (C=C aromatic), 1260 and 1029 (CF3SO3−).

Elemental analysis (%) calcd for C24H37F3N2O4S: C, 56.9; H, 7.4; N, 5.5; found: C, 56.8; H, 7.4; N, 5.6

**612: 1-(4-Dodecyloxybenzyl)-3-methyl-1*H*-imidazol-3-ium bis[(trifluoromethyl)sulfonyl]amide**

Lithium bis[trifluoromethyl)sulfonyl]amide: 0.164 g (0.57 mmol)

1-(4-Dodecyloxybenzyl)-3-methyl-1*H*-imidazol-3-ium bromide: 0.25 g (0.57 mmol)

Water: 20 mL

Yield: 0.363 g, 0.53 mmol (93%)

1H NMR (300 MHz; CDCl3)

: 0.89 (t, 3 H, 3*J* (H,H) = 6.8 Hz, CH3 aliphatic chain); 1.27 (br s, 16 H, CH2 aliphatic chain); 1.44 (m, 2 H, CH2 aliphatic chain); 1.79 (m, 2 H, O–CH2–CH2); 3.96 (t, 2 H, 3*J* (H,H) = 6.5 Hz, OCH2); 3.99 (s, 3 H, CH3–N); 5.28 (s, 2 H, N–CH2–Ph); 6.94 (d, 2 H, 3*J* (H,H) = 8.6 Hz, CH phenyl); 7.12 (m, 1 H, CH imidazolium); 7.16 (m, 1 H, CH imidazolium); 7.31 (d, 2 H, 3*J* (H,H) = 8.6 Hz, CH phenyl); 8.93 (s, 1 H, N–CH–N).

13C NMR (75 MHz; CDCl3 {H})

: 14.04 (CH3 aliphatic chain); 22.62; 25.95; 29.12; 29.29; 29.34; 29.52; 29.55; 29.58; 29.60; 31.86 (CH2 aliphatic chain); 36.27 (N–CH3); 53.15 (N–CH2–Ph); 68.15 (O–CH2); 115.36 (CH phenyl); 119.76 (quadruplet, *J* (C,F)= 321.2 Hz, CF3); 121.89; 123.70 (CH imidazolium); 123.79 (C phenyl); 130.48 (CH phenyl); 135.63 (N–CH–N); 160.20 (C phenyl).

IR: max/cm−1  3156 (C–H aromatic), 2918 and 2848 (C–H aliphatic), 1517 (C=C aromatic), 1353 and 1180 ([CF3SO2]2N)

Elemental analysis (%) calcd for C25H37F6N3O3S2: C, 47.1; H, 5.85; N, 6.6; found: 47.15; H, 5.90; N, 6.6

**114: 1-(4-Tetradecyloxybenzyl)-3-methyl-1*H*-imidazol-3-ium bromide**

**A14**: 9.6 g (30 mmol)

Thionyl bromide: 2.3 ml (30 mmol)

Dichloromethane: 50 mL

*N*-Methylimidazole: 3.6 mL (45 mmol)

Tetrahydrofuran: 50 mL

Yield: 12.3 g, 26,4 mmol (88%)

1H NMR (300 MHz; CDCl3)

: 0.88 (t, 3 H, 3*J* (H,H) = 6.9 Hz, CH3 aliphatic chain); 1.25 (br s, 20 H, CH2 aliphatic chain); 1.42 (m, 2 H, CH2 aliphatic chain); 1.78 (q, 2 H, 3*J* (H,H) = 6.9 Hz, O–CH2–CH2); 3.92 (t, 2 H, 3*J* (H,H) = 6.5 Hz, OCH2); 4.07 (s, 3 H, CH3–N); 5.48 (s, 2 H, N–CH2–Ph); 6.88 (d, 2 H, 3*J* (H,H) = 8.6 Hz, CH phenyl); 7.23 (s, 1 H, CH imidazolium); 7.37 (s, 1 H, CH imidazolium); 7.41 (d, 2 H, 3*J* (H,H) = 8.6 Hz, CH phenyl); 10.50 (s, 1 H, N–CH–N).

13C NMR (75 MHz; CDCl3 {H})

: 14.05 (CH3 aliphatic chain); 22.63; 25.98; 29.14; 29.30; 29.35; 29.53; 29.56; 29.62; 31.87 (CH2 aliphatic chain); 36.75 (N–CH3); 53.08 (N–CH2–Ph); 68.19 (O–CH2); 115.33 (CH phenyl); 121.45; 123.14 (CH imidazolium); 124.41 (C phenyl); 130.62 (CH phenyl); 137.55 (N–CH–N); 160.12 (C phenyl).

IR: max/cm−1  3440 (H2O) 3133 (C–H aromatic), 2919 and 2850 (C–H aliphatic), 1513 (C=C aromatic), 1249 (aromatic ether).

Elemental analysis (%) calcd for C25H41BrN2O·H2O: C, 62.1; H, 9.0; N, 5.8; found: C, 61.9; H, 8.9; N, 5.7

**214: 1-(4-Tetradecyloxybenzyl)-3-methyl-1*H*-imidazol-3-ium tetrafluoroborate**

Sodium tetrafluoroborate: 0.12 g (1.07 mmol)

1-(4-Tetradecyloxybenzyl)-3-methyl-1*H*-imidazol-3-ium bromide: 0.5 g (1.07 mmol)

Water: 60 mL

Yield: 0.434 g, 0.92 mmol (86%)

1H NMR (300 MHz; CDCl3)

: 0.88 (t, 3 H, 3*J* (H,H) = 6.9 Hz, CH3 aliphatic chain); 1.26 (br s, 20 H, CH2 aliphatic chain); 1.42 (m, 2 H, CH2 aliphatic chain); 1.76 (q, 2 H, 3*J* (H,H) = 6.9 Hz, O–CH2–CH2); 3.89–3.93 (m, 5H, CH3–N, OCH2); 5.24 (s, 2 H, N–CH2–Ph); 6.89 (d, 2 H, 3*J* (H,H) = 8.6 Hz, CH phenyl); 7.16 (s, 1 H, CH imidazolium); 7.26 (s, 1 H, CH imidazolium); 7.32 (d, 2 H, 3*J* (H,H) = 8.6 Hz, CH phenyl); 8.87 (s, 1 H, N–CH–N).

13C NMR (75 MHz; CDCl3 {H})

: 14.07 (CH3 aliphatic chain); 22.66; 26.01; 29.18; 29.33; 29.39; 29.57; 29.59; 29.63; 29.66; 31.90 (CH2 aliphatic chain); 36.34 (N–CH3); 53.12 (N–CH2–Ph); 68.19 (O–CH2); 115.36 (CH phenyl); 121.62; 123.47 (CH imidazolium); 124.28 (C phenyl); 130.59 (CH phenyl); 136.47 (N–CH–N); 160.14 (C phenyl).

IR: max/cm−1  3157 (C–H aromatic), 2917 and 2850 (C–H aliphatic), 1515 (C=C aromatic), 1251 (aromatic ether), 1051 (BF4−)

Elemental analysis (%) calcd for C25H41BF4N2O: C, 63.6; H, 8.8; N, 5.9; found: C, 63.6; H, 8.8; N, 5.85

**314: 1-(4-Tetradecyloxybenzyl)-3-methyl-1*H*-imidazol-3-ium hexafluorophosphate**

Potassium hexafluorophosphate: 0.202 g (1.1 mmol)

1-(4-Tetradecyloxybenzyl)-3-methyl-1*H*-imidazol-3-ium bromide: 0.5 g (1.1 mmol)

Water: 60 mL

Yield: 0.51 g, 0.96 mmol (87%)

1H NMR (300 MHz; CDCl3)

: 0.88 (t, 3 H, 3*J* (H,H) = 6.9 Hz, CH3 aliphatic chain); 1.25 (br s, 20 H, CH2 aliphatic chain); 1.42 (m, 2 H, CH2 aliphatic chain); 1.76 (q, 2 H, 3*J* (H,H) = 6.9 Hz, O–CH2–CH2); 3.86 (s, 3 H, CH3–N); 3.92 (t, 2 H, 3*J* (H,H) = 6.5 Hz , OCH2); 5.18 (s, 2 H, N–CH2–Ph); 6.89 (d, 2 H, 3*J* (H,H) = 8.6 Hz, CH phenyl); 7.12 (s, 1 H, CH imidazolium); 7.21 (s, 1 H, CH imidazolium); 7.29 (d, 2 H, 3*J* (H,H) = 8.6 Hz, CH phenyl); 8.52 (s, 1 H, N–CH–N).

13C NMR (75 MHz; CDCl3 {H})

: 14.10 (CH3 aliphatic chain); 22.67; 26.01; 29.17; 29.34; 29.41; 29.67; 31.90 (CH2 aliphatic chain); 36.23 (N–CH3); 53.11 (N–CH2–Ph); 68.17 (O–CH2); 115.37 (CH phenyl); 121.64; 123.51 (CH imidazolium); 123.91 (C phenyl); 130.59 (CH phenyl); 135.85 (N–CH–N); 160.15 (C phenyl).

IR: max/cm−1  3179 (C–H aromatic), 2916 and 2849 (C–H aliphatic), 1517 (C=C aromatic), 1252 (aromatic ether), 824 (PF6−).

Elemental analysis (%) calcd for C25H41F6N2OP: C, 56.6; H, 7.8; N, 5.3; found: C, 56.9; H, 7.7; N, 5.2

**414: 1-(4-Tetradecyloxybenzyl)-3-methyl-1*H*-imidazol-3-ium thiocyanate**

Potassium thiocyanate: 0.208 g (2.14 mmol)

1-(4-Tetradecyloxybenzyl)-3-methyl-1*H*-imidazol-3-ium bromide: 0.500 g (1.07 mmol)

Water: 60 mL

Yield: 403 mg, 0.91 mmol (85%)

1H NMR (300 MHz; CDCl3)

: 0.88 (t, 3 H, 3*J* (H,H) = 6.9 Hz, CH3 aliphatic chain); 1.26 (br s, 20 H, CH2 aliphatic chain); 1.42 (m, 2 H, CH2 aliphatic chain); 1.77 (q, 2 H, 3*J* (H,H) = 6.9 Hz, O–CH2–CH2); 3.93 (t, 2 H, 3*J* (H,H) = 6.5 Hz , OCH2); 4.06 (s, 3 H, CH3–N); 5.42 (s, 2 H, N–CH2–Ph); 6.91 (d, 2 H, 3*J* (H,H) = 8.6 Hz, CH phenyl); 7.26 (s, 1 H, CH imidazolium); 7.33 (s, 1 H, CH imidazolium); 7.39 (d, 2 H, 3*J* (H,H) = 8.6 Hz, CH phenyl); 9.48 (s, 1 H, N–CH–N).

13C NMR (75 MHz; CDCl3 {H})

: 14.06 (CH3 aliphatic chain); 22.64; 25.99; 29.15; 29.31; 29.36; 29.54; 29.57; 29. 61; 29.63; 31.88 (CH2 aliphatic chain); 36.82 (N–CH3); 53.45 (N–CH2–Ph); 68.21 (O–CH2); 115.41 (CH phenyl); 121.76; 123.43 (CH imidazolium); 124.10 (C phenyl); 130.71 (CH phenyl); 131.73 (SCN); 137.00 (N–CH–N); 160.20 (C phenyl).

IR: max/cm−1  3350 (H2O) 3147 (C–H aromatic), 2917 and 2850 (C–H aliphatic), 2065 (SCN−) 1515 (C=C aromatic), 1251 (aromatic ether).

Elemental analysis (%) calcd for C26H41N3OS·¾ H2O: C, 68.3; H, 9.4; N, 9.2; found: C, 68.2; H, 9.2; N, 9.1

**514: 1-(4-Tetradecyloxybenzyl)-3-methyl-1*H*-imidazol-3-ium trifluoromethanesulfonate**

Sodium trifluoromethanesulfonate: 0.368 g (2.14 mmol)

1-(4-Tetradecyloxybenzyl)-3-methyl-1*H*-imidazol-3-ium bromide: 0.5 g (1.07 mmol)

water: 60 mL

Yield: 0.4 g, 0.75 mmol (70%)

1H NMR (300 MHz; CDCl3)

: 0.89 (t, 3 H, 3*J* (H,H) = 6.8 Hz, CH3 aliphatic chain); 1.27 (br s, 16 H, CH2 aliphatic chain); 1.41 (m, 2 H, CH2 aliphatic chain); 1.78 (q, 2 H, 3*J* (H,H) = 6.6 Hz, O–CH2–CH2); 3.95 (t, 2 H, 3*J* (H,H) = 6.6 Hz, OCH2); 3.99 (s, 3 H, CH3–N); 5.31 (s, 2 H, N–CH2–Ph); 6.92 (d, 2 H, 3*J* (H,H) = 8.6 Hz, CH phenyl); 7.10 (m, 1 H, CH imidazolium); 7.16 (m, 1 H, CH imidazolium); 7.32 (d, 2 H, 3*J* (H,H) = 8.6 Hz, CH phenyl); 9.40 (s, 1 H, N–CH–N).

13C NMR (75 MHz; CDCl3 {H})

: 14.02 (CH3 aliphatic chain); 22.60; 25.94; 29.10; 29.26; 29.26; 29.32; 29.50; 29.53; 29.58; 31.83 (CH2 aliphatic chain); 36.26 (N–CH3); 52.96 (N–CH2–Ph); 68.10(O–CH2); 115.23 (CH phenyl); 120.6 (q, *J (*C–F)= 320 Hz, CF3); 121.76; 123.61 (CH imidazolium); 124.31 (C phenyl); 130.46 (CH phenyl); 136.34 (N–CH–N); 160.02 (C phenyl).

IR: max/cm−1  3157 (C–H aromatic), 2918 and 2849 (C–H aliphatic), 1517 (C=C aromatic), 1251 and 1030 (CF3SO3−).

Elemental analysis (%) calcd for C26H41F3N2O4S: C, 58.4; H, 7.7; N, 5.2; found: C, 58.25; H, 7.6; N, 5.2

**614: 1-(4-Tetradecyloxybenzyl)-3-methyl-1*H*-imidazol-3-ium bis[(trifluoromethyl)sulfonyl]amide**

Lithium bis[(trifluoromethyl)sulfonyl]amide: 0.171 g (0.59 mmol)

1-(4-Tetradecyloxybenzyl)-3-methyl-1*H*-imidazol-3-ium bromide: 0.25 g (0.54 mmol)

Water: 30 mL

Yield: 0.275 g, 0.41 mmol (76%)

1H NMR (300 MHz; CDCl3)

: 0.89 (t, 3 H, 3*J* (H,H) = 6.4 Hz, CH3 aliphatic chain); 1.27 (br s, 20 H, CH2 aliphatic chain); 1.44 (m, 2 H, CH2 aliphatic chain); 1.78 (q, 2 H, 3*J* (H,H) = 6.6 Hz, O–CH2–CH2); 3.93 (s, 3 H, CH3–N); 3.96 (t, 2 H, 3*J* (H,H) = 6.6 Hz , OCH2); 5.25 (s, 2 H, N–CH2–Ph); 6.92 (d, 2 H, 3*J* (H,H) = 8.8 Hz, CH phenyl); 7.15 (s, 1 H, CH imidazolium); 7.22 (s, 1 H, CH imidazolium); 7.29 (d, 2 H, 3*J* (H,H) = 8.6 Hz, CH phenyl); 8.79 (s, 1 H, N–CH–N).

13C NMR (75 MHz; CDCl3 {H})

: 14.07 (CH3 aliphatic chain); 22.67; 26.00; 29.16; 29.33; 29.37; 29.56; 29.58; 29.66; 31.91 (CH2 aliphatic chain); 36.50 (N–CH3); 53.41 (N–CH2–Ph); 68.27 (O–CH2); 115.53 (CH phenyl); 119.83 (quadruplet, *J* (C,F)= 319.10 Hz, CF3); 121.80; 123.49 (CH imidazolium); 123.57 (C phenyl); 130.58 (CH phenyl); 136.12 (N–CH–N); 160.39 (C phenyl).

IR: max/cm−1  3157 (C–H aromatic), 2917 and 2848 (C–H aliphatic), 1517 (C=C aromatic), 1353 and 1181 ([CF3SO2]2N−)

Elemental analysis (%) calcd for C27H41F6N3O5S2·½ H2O: C, 48.1; H, 6.3; N, 6.2; found: C, 48.15; H, 6.1; N, 6.2

**116: 1-(4-Hexadecyloxybenzyl)-3-methyl-1*H*-imidazol-3-ium bromide**

**A16**: 5 g (14.4 mmol)

Thionyl bromide: 1.3 mL (16.7 mmol)

Dichloromethane: 50 mL

*N*-Methylimidazole: 1.3 mL (15.8 mmol)

Tetrahydrofuran: 50 mL

Yield: 6.06 g, 12.2 mmol (85%)

1H NMR (300 MHz; CDCl3)

: 0.88 (t, 3 H, 3*J* (H,H) = 6.9 Hz, CH3 aliphatic chain); 1.26 (br s, 24 H, CH2 aliphatic chain); 1.43 (m, 2 H, CH2 aliphatic chain); 1.77 (q, 2 H, 3*J* (H,H) = 6.9 Hz, O–CH2–CH2); 3.91 (t, 2 H, 3*J* (H,H) = 6.5 Hz, OCH2); 4.08 (s, 3 H, CH3–N); 5.48 (s, 2 H, N–CH2–Ph); 6.89 (d, 2 H, 3*J* (H,H) = 8.6 Hz, CH phenyl); 7.18 (s, 1 H, CH imidazolium); 7.25 (s, 1 H, CH imidazolium); 7.40 (d, 2 H, 3*J* (H,H) = 8.6 Hz, CH phenyl); 10.56 (s, 1 H, N–CH–N).

13C NMR (75 MHz; CDCl3 {H})

: 14.04 (CH3 aliphatic chain); 22.61; 25.95; 29.10; 29.28; 29.33; 29.51; 31.84 (CH2 aliphatic chain); 36.74 (N–CH3); 52.96 (N–CH2–Ph); 68.11 (O–CH2); 115.21 (CH phenyl); 121.51; 123.26 (CH imidazolium); 124.47 (C phenyl); 130.59 (CH phenyl); 137.21 (N–CH–N); 159.99 (C phenyl).

IR: max/cm−1  3421 (H2O) 3133 (C–H aromatic), 2915 and 2849 (C–H aliphatic), 1515 (C=C aromatic), 1250 (aromatic ether).

Elemental analysis (%) calcd for C27H45BrN2O·H2O: C, 63.4; H, 9.3; N, 5.5; found: C, 63.3; H, 9.0; N, 5.4

**216: 1-(4-Hexadecyloxybenzyl)-3-methyl-1*H*-imidazol-3-ium tetrafluoroborate**

Sodium tetrafluoroborate: 0.118 g (1.05 mmol)

1-(4-Hexadecyloxybenzyl)-3-methyl-1*H*-imidazol-3-ium bromide: 0.5 g (1.05 mmol)

Water: 60 mL

Yield: 0.5 g, 1.00 mmol (95%)

1H NMR (300 MHz; CDCl3)

: 0.88 (t, 3 H, 3*J* (H,H) = 6.9 Hz, CH3 aliphatic chain); 1.26 (br s, 24 H, CH2 aliphatic chain); 1.39–1.47 (m, 2 H, CH2 aliphatic chain); 1.76 (m, 2 H, O–CH2–CH2); 3.89–3.93 (m, 5H, CH3–N, OCH2); 5.23 (s, 2 H, N–CH2–Ph); 6.87 (d, 2 H, 3*J* (H,H) = 8.6 Hz, CH phenyl); 7.17 (m, 1 H, CH imidazolium); 7.27 (m, 1 H, CH imidazolium); 7.31 (d, 2 H, 3*J* (H,H) = 8.6 Hz, CH phenyl); 8.83 (s, 1 H, N–CH–N).

13C NMR (75 MHz; CDCl3 {H})

: 14.08 (CH3 aliphatic chain); 22.66; 26.00; 29.17; 29.33; 29.40; 29.57; 29.60; 29.62; 29.67; 31.89 (CH2 aliphatic chain); 36.26 (N–CH3); 53.00 (N–CH2–Ph); 68.16 (O–CH2); 115.29 (CH phenyl); 121.63; 123.52 (CH imidazolium); 124.36 (C phenyl); 130.57 (CH phenyl); 136.29 (N–CH–N); 160.06 (C phenyl).

IR: max/cm−1  3160 (C–H aromatic), 2916 and 2849 (C–H aliphatic), 1516 (C=C aromatic), 1251 (aromatic ether), 1048 (BF4−)

Elemental analysis (%) calcd for C27H45BF4N2O·¾ H2O: C, 63.1; H, 9.1; N, 5.45; found: C, 63.0; H, 9.0; N, 5.4

**316: 1-(4-Hexadecyloxybenzyl)-3-methyl-1*H*-imidazol-3-ium hexafluorophosphate**

Potassium hexafluorophosphate: 0.181 g (0.98 mmol)

1-(4-Hexadecyloxybenzyl)-3-methyl-1*H*-imidazol-3-ium bromide: 0.5 g (0.98 mmol)

Water: 60 mL

Yield: 0.472 g, 0.84 mmol (86%)

1H NMR (300 MHz; CDCl3)

: 0.88 (t, 3 H, 3*J* (H,H) = 6.9 Hz, CH3 aliphatic chain); 1.26 (br s, 24 H, CH2 aliphatic chain); 1.44 (m, 2 H, CH2 aliphatic chain); 1.76 (q, 2 H, 3*J* (H,H) = 6.6 Hz, O–CH2–CH2); 3.88 (s, 3 H, CH3–N); 3.90 (t, 2 H, 3*J* (H,H) = 6.5 Hz , OCH2); 5.20 (s, 2 H, N–CH2–Ph); 6.90 (d, 2 H, 3*J* (H,H) = 8.6 Hz, CH phenyl); 7.12 (s, 1 H, CH imidazolium); 7.21 (s, 1 H, CH imidazolium); 7.30 (d, 2 H, 3*J* (H,H) = 8.6 Hz, CH phenyl); 8.59 (s, 1 H, N–CH–N).

13C NMR (75 MHz; CDCl3 {H})

: 14.10 (CH3 aliphatic chain); 22.67; 26.01; 29.17; 29.34; 29.41; 29.58; 29.62; 29.64; 29.68; 31.91 (CH2 aliphatic chain); 36.27 (N–CH3); 53.14 (N–CH2–Ph); 68.18 (O–CH2); 115.37 (CH phenyl); 121.62; 123.47 (CH imidazolium); 123.89 (C phenyl); 130.59 (CH phenyl); 135.95 (N–CH–N); 160.16 (C phenyl).

IR: max/cm−1  3154 (C–H aromatic), 2916 and 2850 (C–H aliphatic), 1517 (C=C aromatic), 1252 (aromatic ether), 825 (PF6−)

Elemental analysis (%) calcd for C27H45F6N2OP: C, 58.05; H, 8.1; N, 5.0; found: C, 58.2; H, 8.0; N, 5.0

**416: 1-(4-Hexadecyloxybenzyl)-3-methyl-1*H*-imidazol-3-ium thiocyanate**

Potassium thiocyanate: 0.196 g (2.02 mmol)

1-(4-Tetradecyloxybenzyl)-3-methyl-1*H*-imidazol-3-ium bromide: 0.5 g (1.01 mmol)

Water: 60 mL

Yield: 0.395 g, 0.83 mmol (83%)

1H NMR (300 MHz; CDCl3)

: 0.88 (t, 3 H, 3*J* (H,H) = 6.9 Hz, CH3 aliphatic chain); 1.26 (br s, 24 H, CH2 aliphatic chain); 1.44 (m, 2 H, CH2 aliphatic chain); 1.77 (q, 2 H, 3*J* (H,H) = 6.6 Hz, O–CH2–CH2); 3.93 (t, 2 H, 3*J* (H,H) = 6.5 Hz , OCH2); 4.06 (s, 3 H, CH3–N); 5.42 (s, 2 H, N–CH2–Ph); 6.90 (d, 2 H, 3*J* (H,H) = 8.6 Hz, CH phenyl); 7.25 (m, 1 H, CH imidazolium); 7.34 (m, 1 H, CH imidazolium); 7.38 (d, 2 H, 3*J* (H,H) = 8.6 Hz, CH phenyl); 9.47 (s, 1 H, N–CH–N).

13C NMR (75 MHz; CDCl3 {H})

: 14.06 (CH3 aliphatic chain); 22.64; 25.99; 29.15; 29.31; 29.37; 29.54; 29.57; 29.65; 31.89 (CH2 aliphatic chain); 36.81 (N–CH3); 53.43 (N–CH2–Ph); 68.21 (O–CH2); 115.42 (CH phenyl); 121.77; 123.45 (CH imidazolium); 124.13 (C phenyl); 130.70 (CH phenyl); 131.70 (SCN); 136.97 (N–CH–N); 160.18 (C phenyl).

IR: max/cm−1  3147 (C–H aromatic); 2916 and 2849 (C–H aliphatic); 2064 (SCN), 1515 (C=C aromatic); 1249 (aromatic ether)

Elemental analysis (%) calcd for C28H45N3OS + H2O: C, 68.7; H, 9.7; N, 8.6; found: C, 68.7; H, 9.6; N, 8.6

**516: 1-(4-Hexadecyloxybenzyl)-3-methyl-1*H*-imidazol-3-ium trifluoromethanesulfonate**

Sodium trifluoromethanesulfonate: 0.348 g (2.02 mmol)

1-(4-Hexadecyloxybenzyl)-3-methyl-1*H*-imidazol-3-ium bromide: 0.5 g (1.01 mmol)

Water: 60 mL

Yield: 0.41 g, 0.72 mmol (72%)

1H NMR (300 MHz; CDCl3)

: 0.88 (t, 3 H, 3*J* (H,H) = 6.8 Hz, CH3 aliphatic chain); 1.26 (br s, 24 H, CH2 aliphatic chain); 1.41 (m, 2 H, CH2 aliphatic chain); 1.77 (q, 2 H, 3*J* (H,H) = 6.6 Hz, O–CH2–CH2); 3.92 (t, 2 H, 3*J* (H,H) = 6.6 Hz, OCH2); 3.95 (s, 3 H, CH3–N); 5.26 (s, 2 H, N–CH2–Ph); 6.89 (d, 2 H, 3*J* (H,H) = 8.6 Hz, CH phenyl); 7.21 (m, 1 H, CH imidazolium); 7.29 (m, 1 H, CH imidazolium); 7.32 (d, 2 H, 3*J* (H,H) = 8.6 Hz, CH phenyl); 9.14 (s, 1 H, N–CH–N).

13C NMR (75 MHz; CDCl3 {H})

: 14.07 (CH3 aliphatic chain); 22.65; 26.00; 29.17; 29.31; 29.38; 29.56; 29.59; 29.66; 31.89 (CH2 aliphatic chain); 36.38 (N–CH3); 53.14 (N–CH2–Ph); 68.19 (O–CH2); 115.37 (CH phenyl); 120.7 (q, *J (*C–F)= 320 Hz, CF3); 121.71; 123.50 (CH imidazolium); 124.21 (C phenyl); 130.54 (CH phenyl); 136.68 (N–CH–N); 160.17 (C phenyl).

IR: max/cm−1  3122 (C–H aromatic), 2918 and 2849 (C–H aliphatic), 1516 (C=C aromatic), 1260 and 1030 (CF3SO3−).

Elemental analysis (%) calcd for C28H45F3N2O4S: C, 59.8; H, 8.1; N, 5.0; found: C, 60.3; H, 8.2; N, 4.9

**616: 1-(4-Hexadecyloxybenzyl)-3-methyl-1*H*-imidazol-3-ium bis[(trifluoromethyl)sulfonyl]amide**

Lithium bis[(trifluoromethyl)sulfonyl]amide: 0.161 g (0.56 mmol)

1-(4-Tetradecyloxybenzyl)-3-methyl-1*H*-imidazol-3-ium bromide: 0.25 g (0.51 mmol)

Water: 30 mL

Yield: 0.285 g, 0.41 mmol (81%)

1H NMR (300 MHz; CDCl3)

: 0.89 (t, 3 H, 3*J* (H,H) = 6.7 Hz, CH3 aliphatic chain); 1.27 (br s, 24 H, CH2 aliphatic chain); 1.44 (m, 2 H, CH2 aliphatic chain); 1.78 (q, 2 H, 3*J* (H,H) = 6.6 Hz, O–CH2–CH2); 3.93 (s, 3 H, CH3–N); 3.95 (t, 2 H, 3*J* (H,H) = 6.5 Hz , OCH2); 5.25 (s, 2 H, N–CH2–Ph); 6.92 (d, 2 H, 3*J* (H,H) = 8.6 Hz, CH phenyl); 7.15 (s, 1 H, CH imidazolium); 7.22 (s, 1 H, CH imidazolium); 7.30 (d, 2 H, 3*J* (H,H) = 8.6 Hz, CH phenyl); 8.77 (s, 1 H, N–CH–N).

13C NMR (75 MHz; CDCl3 {H})

: 14.07 (CH3 aliphatic chain); 22.66; 26.01; 29.17; 29.34; 29.38; 29.57; 29.59; 29.67; 31.91 (CH2 aliphatic chain); 36.47 (N–CH3); 53.38 (N–CH2–Ph); 68.25 (O–CH2); 115.50 (CH phenyl); 119.83 (quadruplet, *J* (C,F)= 319.10 Hz, CF3); 121.81; 123.52 (CH imidazolium); 123.59 (C phenyl); 130.57 (CH phenyl); 136.06 (N–CH–N); 160.36 (C phenyl).

IR: max/cm−1  3156 (C–H aromatic), 2917 and 2848 (C–H aliphatic), 1517 (C=C aromatic), 1353 and 1180 ([CF3SO2]2N−)

Elemental analysis (%) calcd for C29H45F6N3O5S2: C, 50.2; H, 6.5; N, 6.1; found: C, 50.4; H, 6.7; N, 5.9

Liquid Crystalline properties.

**Table SI-1:** Temperatures and enthalpy changes of the phase transitions for **112–16** to **612–16**.

Cr: solid; SmA: Smectic A phase; I: isotropic liquid; Dec: decomposition.

| **1n**–**5n** | Phase sequences  °C (kJ·mol−1 ) | **2n**–**6n** | Phase sequences  °C (kJ·mol−1 ) |
| --- | --- | --- | --- |
| **112** | Cr1 −18.2(13.4) Cr2 30.4(35.6) SmA 250(–)b Iso  Iso 250(–)b SmA 9.7(12.6) Cr1 | **212** | Cr1 13.8(11.9)a Cr2 61.5(29.6) Cr3 65(2.5) SmA 203 (–)b Iso  Iso 200(–)b SmA 11(18.2) Cr1 |
| **312** | Cr1 16.7 (7.6)a Cr2 75.4(41) SmA 148(0.6) Iso  Iso 147.5(0.6) SmA 11.3(14.5) Cr1 | **412** | Cr 52.7(48.3) SmA 188(0.9) I  I 188(0.9) SmA 34.4(50.0) Cr |
| **512** | Cr 67(48.1) I  I 63.5(0.4) SmA 28(40.5) Cr | **612** | Cr 49.5(60.5) I  I 20.3(49.5) Cr |
| **114** | Cr 32.9(18.5) SmA 250(–) Dec  SmA 24.4(20.0) Cr | **214** | Cr1 35.2(18.9) Cr2 49(16.8)a Cr3  56(7.4) Cr471.6(13.4) SmA 250 (–)Dec  SmA 32.5(23.1) Cr |
| **314** | Cr1 35.6(8.0)b Cr2 81(42.6) SmA 195(0.9)Iso  Iso194.2(0.9) SmA 31.7(21.7) Cr | **414** | Cr 52(29.6) SmA 250(–) Dec  SmA 34.3(36.5) Cr |
| **514** | Cr1 24.4(19.7) b Cr2 74.1(47.9)SmA 111.3(0.7) Iso  Iso 110.7(1.4) SmA 33(24.0) | **614** | Cr 61,7(69.2) Iso  Iso 33,4(62.9) Cr |
| **116** | Cr 48.2(20.7) SmA 250(–) Dec  SmA 44.8(28.8) Cr | **216** | Cr1 50.6(23.0) Cr2 59(39.1) a Cr3 77.7(40.7) SmA  250 (–) Dec  SmA 49(25.25) Cr1 |
| **316** | Cr1 45.4(24.15)a Cr2 86.9(55.4)  SmA 250(–) Dec  SmA 48.1(27.7) Cr | **416** | Cr 62(45.6) SmA 250(–) Dec  SmA 45,3(38.5) Cr |
| **516** | Cr1 40,9(25.8)a Cr2 79,6(58.7)  SmA 148(1.45) Iso  Iso 147.6(29.5) SmA 48.1(1.2) Cr | **616** | Cr 56.3(73.3) Iso  Iso 23.9(61.0) Cr |

aCold crystallisation, bTransition observed by POM

**Table SI-2:** Indexation of the reflections detected in the SmA liquid-crystalline phase by SAXS/WAXS for **18**–**48** at given temperatures. *d*hkl (mes) are the measured diffraction spacing and correspond to the periodicity of layer. *I* corresponds to the intensity of the reflections (++: strong, +: weak).

| Compounds | *T* (°C) | *d*00l(mes)(Å) | *I* (u.a.) | 00l |
| --- | --- | --- | --- | --- |
| **18** | 100 | 31.73 | ++ | 001 |
| **28** | 30 | 32.88 | ++ | 001 |
| **48** | 30 | 32.77 | ++ | 001 |

**Table SI-3:** Indexation of the reflections detected in the SmA liquid-crystalline phase by SAXS/WAXS for **110**–**410** at given temperatures. *d*00l(mes) and *d*00l(calc) are the measured and calculated diffraction spacing, d001 is the periodicity of the smectic phase *d*00l(calc) = (2·*d*002(mes) + *d*001(mes))/2. I corresponds to the intensity of the reflections (++: strong, +: weak).

| Compounds | *T* (°C) | *d*00l(mes)(Å) | I (u.a.) | 00l | *d*00l(calc)(Å) |
| --- | --- | --- | --- | --- | --- |
| **110** | 80 | 34.89  17.38 | ++  + | 001  002 | 34.82  17.41 |
| **210** | 80 | 33,91  17.02 | ++  + | 001  002 | 33.98  16.99 |
| **310** | 80 | 33.48 | ++ | 001 | 33.48 |
| **410** | 80 | 34.08  17.02 | ++  + | 001  002 | 34.06  17.03 |

**Table SI-4:** Indexation of the reflections detected in the SmA liquid-crystalline phase by SAXS/WAXS for **112**–**412** at given temperatures. *d*00l(mes) and *d*00l(calc) are the measured and calculated diffraction spacing, *d*001 is the periodicity of the smectic phase *d*00l(calc) = (2·*d*002(mes) + *d*001(mes))/2. I corresponds to the intensity of the reflections (++: strong, +: weak).

| Compounds | *T* (°C) | *d*00l(mes)(Å) | I (u.a.) | 00l | *d*00l(calc)(Å) |
| --- | --- | --- | --- | --- | --- |
| **112** | 100 | 37.45 | ++ | 001 | 37.45 |
| **212** | 100 | 36.07  17.94  12.02 | ++  +  + | 001  002  003 | 35.95  17.98  11.98 |
| **312** | 100 | 35.35 | ++ | 001 | 35.35 |
| **412** | 100 | 36.03  17.85 | ++  + | 001  002 | 35.86  17.93 |

**Table SI-5:** Indexation of the reflections detected in the SmA liquid-crystalline phase by SAXS/WAXS for **114**–**514** at given temperatures. d00l(mes) and d00l(calc) are the measured and calculated diffraction spacing, d001 is the periodicity of the smectic phase d00l(calc) = (2·*d*002(mes) + *d*001(mes))/2. I corresponds to the intensity of the reflections (++: strong, +: weak).

| Compounds | *T* (°C) | *d*00l(mes)(Å) | *I* (u.a.) | 00l | *d*00l(calc)(Å) |
| --- | --- | --- | --- | --- | --- |
| **114** | 100 | 40.29  20.01 | ++  + | 001  002 | 40.15  20.08 |
| **214** | 100 | 39.09 | ++ | 001 | 39.09 |
| **314** | 100 | 38.08  18.97 | ++  + | 001  002 | 38.01  19.00 |
| **414** | 100 | 38.54  19.30 | ++  + | 001  003 | 38.68  19.34 |
| **514** | 100 | 35.93 | ++ | 001 | 35.93 |

**Table SI-6:** Indexation of the reflections detected in the SmA liquid-crystalline phase by SAXS/WAXS for **116**–**516** at given temperatures. *d*00l(mes) and *d*00l(calc) are the measured and calculated diffraction spacing, d001 is the periodicity of the smectic phase *d*00l(calc) = (2·*d*002(mes) + *d*001(mes))/2. *I* corresponds to the intensity of the reflections (++: strong, +: weak).

| Compounds | *T* (°C) | *d*00l (mes) **/** Å | *I* (u.a.) | 00l | *d*00l(cal) **/** Å |
| --- | --- | --- | --- | --- | --- |
| **116** | 100 | 43.72  21.68 | ++  + | 001  002 | 43.54  21.77 |
| **216** | 100 | 41.67  20.87 | ++  + | 001  002 | 41.71  20.85 |
| **316** | 100 | 40.53  20.24 | ++  + | 001  002 | 40.51  20.26 |
| **416** | 100 | 41.41  13.67 | ++  + | 001  003 | 41.21  13.74 |
| **516** | 100 | 38.53  18.91 | ++  + | 001  002 | 38.18  19.09 |

**Table SI-7:** Temperature of the isotropic transition and molecular area limit calculated at the clearing point.

| Compounds | Slimit (Å2) | *T*iso (°C) | Compounds | Slimit (Å2) | *T*iso (°C) |
| --- | --- | --- | --- | --- | --- |
| **112** | 43.6a | 250 | **114** | – | 263b |
| **212** | 44.1a | 200 | **214** | – | 248b |
| **312** | 43.2a | 148 | **314** | 46.2a | 195 |
| **412** | 42.9a | 188 | **414** | – | 233b |
|  |  |  | **514** | 47.9a | 111 |

aCalculated according to the linear fit of the data obtained by the dilatometry study, bcalculated considering 47 Å2 as Slimit


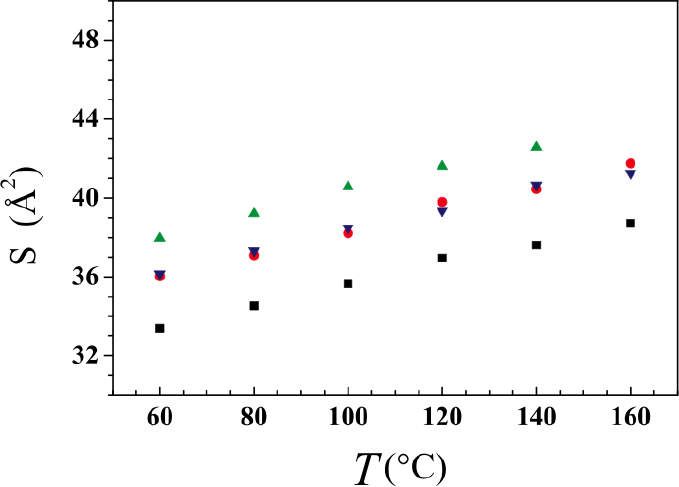


**Figure SI-1:** Variation with the counter-ion of the molecular area S in the smectic A phase for series: squares: **112**; circles: **212**; up triangles: **312**; down triangles: **412**.


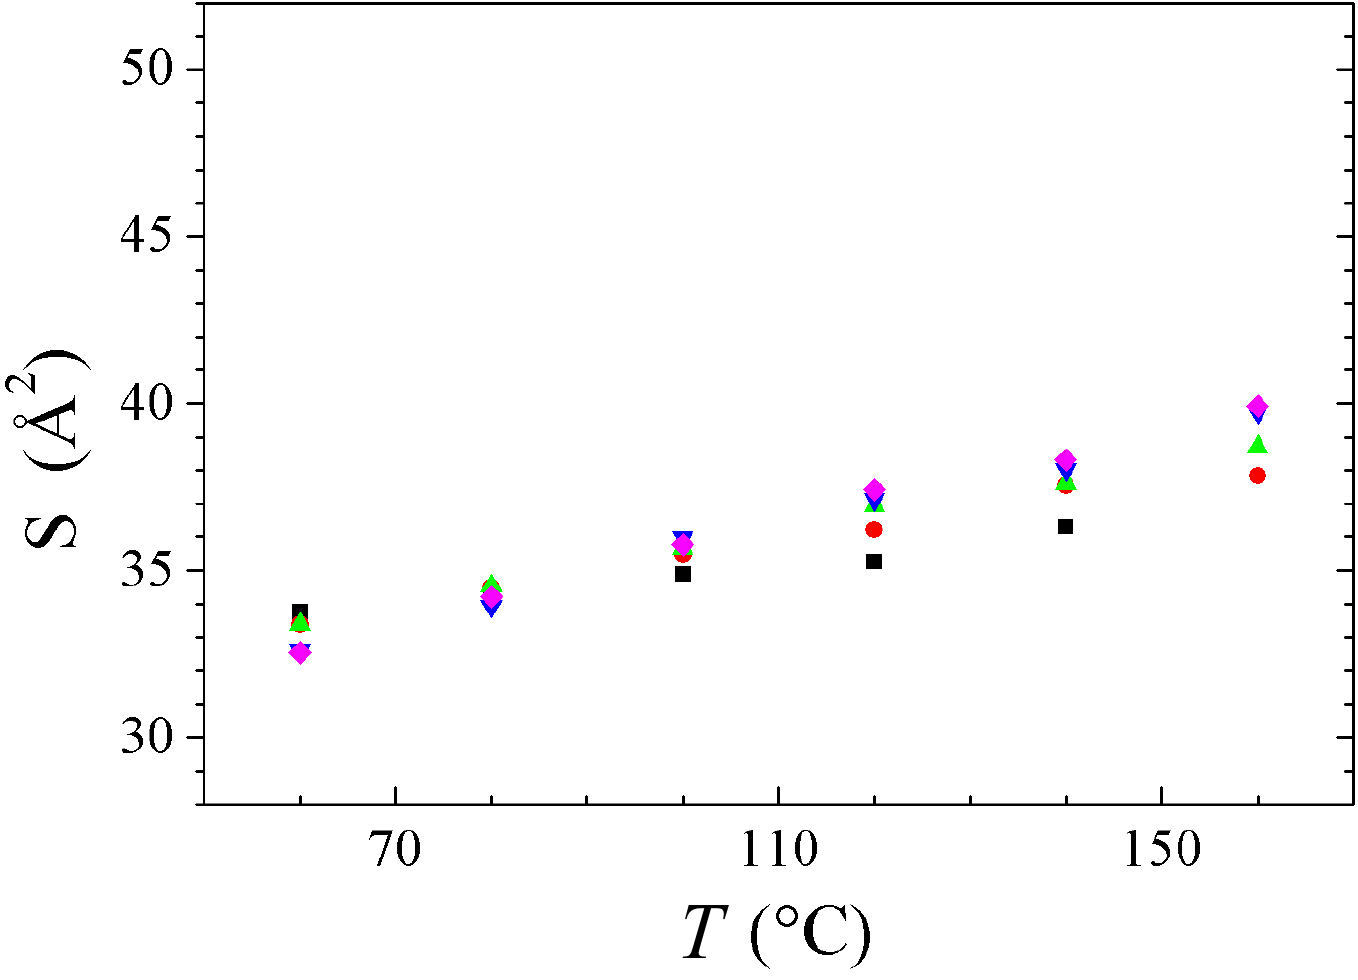


**Figure SI-2:** Variation with chain length of the molecular area S in the smectic A phase for the series with bromide anion: squares: **18**; circles: **110**; up triangles: **112**; down triangles: **114**; diamonds: **116**.

1. the chemical shift is symbolised by δ and expressed in ppm [↑](#footnote-ref-2)
2. the multiplicity is symbolised by s: singlet; d: doublet; t: triplet; q: quintuplet and m: multiplet [↑](#footnote-ref-3)
3. the coupling constants are symbolised by *J* and are expressed in Hz [↑](#footnote-ref-4)
